# Supplementary material for: Synthesis of monodispersed α-FeOOH nanorods with a high content of surface hydroxyl groups and enhanced ion-exchange properties towards As(v)
Source: Royal Society of Chemistry journal article supplement (doi:10.1039/c3ra40980e), 2013-01-01
Supplement: c3ra40980e.pdf [file c3ra40980e.pdf]

Supplementary information for

**Synthesis of monodispersed  $\alpha$ -FeOOH nanorods with high content of surface hydroxyl groups and enhanced ion-exchange properties towards As(V)**

Yong Jia,<sup>a,b</sup> Tao Luo,<sup>a</sup> Xin-Yao Yu,<sup>a</sup> Bai-Sun,<sup>a</sup> Jin-Huai Liu<sup>a</sup> and Xing-Jiu Huang<sup>\*a</sup>

<sup>a</sup> Research Center for Biomimetic Functional Materials and Sensing Devices, Institute of Intelligent Machines, Chinese Academy of Sciences, Hefei 230031, PR China

<sup>b</sup> Department of Pharmacy, Anhui University of Chinese Medicine, Hefei 230031, PR China

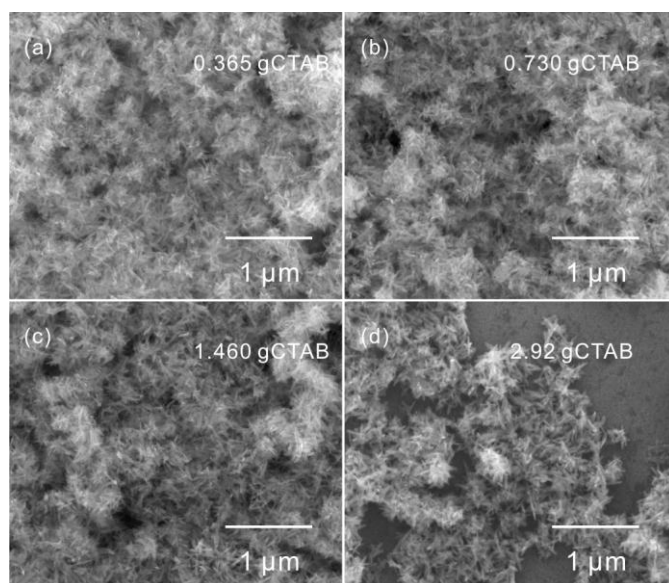

**Fig.S1** SEM images of the obtained products synthesized with different amount of CTAB.

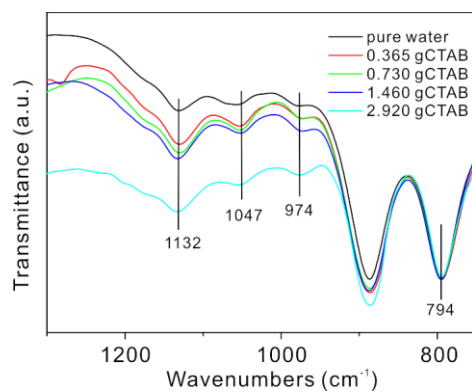

**Fig. S2** FTIR spectra of the obtained products synthesized with different amount of CTAB.
